# Supplementary material for: Full Scale Wind Turbine Performance Assessment: A Customised, Sensor-Augmented Aeroelastic Modelling Approach
Source: Copernicus journal article supplement (doi:10.5194/wes-2024-49), 2024-04-29
Supplement: Supplementary file [file wes-2024-49-AC1-supplement.pdf]

## RC1: 'Comment on wes-2024-49', Anonymous Referee #1, 06 Jun 2024

The paper presents a comprehensive study on wind turbine performance assessment using a sensor-augmented aeroelastic modeling approach, specifically focusing on blade erosion. It combines HAWC2 aeroelastic simulations with real-world operational data to identify effective sensors for monitoring blade erosion effects. The study emphasizes the importance of customized sensor selection tailored to specific turbine models and control systems. With some enhancements in detail, this paper could set a strong precedent for future research in wind turbine monitoring systems.

There are several points that require improvement for the paper to meet publication standards. Below are detailed comments and suggestions for enhancing the manuscript.

1. The methodology section contains extensive descriptions of previous studies by other researchers and the authors' past work, which dilutes the focus on the current study's innovations. I suggest that the authors summarize previous studies more concisely to provide a brief background and context. Focus on highlighting the unique contributions and innovations of the current study. Emphasize what distinguishes this work from existing literature.

- Introduction updated to include
  - summaries of previous work
  - sharper description of motivation of current work
- Method
  - Updated to summarise previous studies and highlight current contributions
  - Expanded to provide more detailed method to lean less on previous study

2. Some sections of the methodology, particularly the simulation settings and test cases, could be expanded to provide more clarity. For instance, more details on the HAWC2 model parameters and the specific conditions simulated would enhance reproducibility. The treatment of SCADA data and the specific algorithms used for analysis (e.g., STL decomposition) should be described in more detail. Elaborate on the simulation settings, including the exact parameters and conditions used in HAWC2, to ensure the study can be replicated by other researchers.

- Method: Section 2 is now expanded to provide a more detailed explanation of our methodology for clarity and reproducibility. This includes the treatment of SCADA data and STL decomposition, described in more detail.
- Concise text added such as HAWC2 simulation settings to clarify distinction and a reference added.
- The comparison between *simulation and empirical observations* is relevant for Section 2.1 for sensor pair identification **not** Section 2.3 – correction made.

3. One of the main innovations claimed by the authors is the combination of simulation and actual measurement data to identify sensors sensitive to blade corrosion. However, the methodology section, particularly Section 2.3, lacks detailed descriptions of this process. I suggest that the authors provide a clear, detailed explanation of how the combination of simulation and measurement data is implemented. Describe the iterative approach mentioned in Section 2.3 in specific terms, outlining each step of the methodology, the tools used, and the

rationale behind the chosen methods. This will enhance the transparency and reproducibility of your study.

4. Section 2.3 of the methodology appears to be incomplete or missing crucial details. Statements like “The primary objective of this section is the rigorous evaluation of numerous sensors' potential” and “The work, therefore, employs a comprehensive methodology that employs an iterative approach” are vague and lack substantive information. Please confirm the completeness of Section 2.3 and ensure it contains all necessary details. Specifically, provide a step-by-step guide on the rigorous evaluation of sensors, including the criteria for sensor selection, the process of integrating simulation with real-world data, and examples of how this methodology was applied in your study. Clarify any ambiguous statements to improve the reader's understanding.

- RE Section 2.3: Upon careful review, it has come to our attention that certain aspects of the section may have been subject to interpretation. In the interest of maintaining the highest standards of accuracy and transparency, we have taken the opportunity to refine and correct the language to more precisely align with the scope and outcomes of this study. This adjustment serves to enhance clarity and ensure that readers have a well-calibrated understanding of the research parameters and deliverables. Therefore the text has been revised and corrected.
- To enhance clarity, it is important to specify that the phrase "*employs a comprehensive methodology that employs an iterative approach, integrating theoretical simulation and empirical validation to ensure that the findings are anchored in both theoretical rigour and operational relevance*" requires further refinement. Specifically, it should be noted that there is no iteration of the simulated results to compare with empirical results from a turbine due to lack of access or existence of the broader sensor set. The language has been adjusted to align with the actual methodology employed, thereby correctly managing the readers expectations. Additionally, we have included further details on the criteria for sensor selection and provided an expanded explanation to ensure comprehensive understanding. The iteration of the broader sensor set shall be a suggestion for further work.

The section now provides a more detailed explanation of our methodology, including:  
A clearer description of the sensor selection criteria, emphasizing relevance to blade aerodynamic performance, availability in existing systems, sensitivity to erosion-induced changes, and signal-to-noise ratio.

An outline of our approach, including the selection of virtual sensors, conducting simulations under various conditions, data processing and analysis using Cohen's  $d$ .

We have also improved the overall flow and clarity of this section, removing vague statements and providing more details. The revised section now offers a more transparent and reproducible account of our methodology, addressing the concerns raised in your review.

5. The results are presented with limited interpretation and explanation. Several key findings are stated without providing sufficient context or analysis to help the reader understand their significance. The information in some figures in the article is too dense, such as Figure 9 and 15, and the description of the figure information is insufficient before and after some figures, preventing the reader from fully understanding the relevance of the figures and how to draw

relevant conclusions. The text arrangement of some figures in this paper needs to be optimized, such as Figure 12, A1, and A2.

- RE Figure 9: Thank you for your comment on Figure 9's density. While the figure is complex, its primary purpose is to illustrate the high degree of synchronization across the entire turbine fleet, not to track individual turbine performance. We've added explanatory text to guide readers and text to the caption. This additional context directs readers to focus on the overall trend and synchronicity, which are key findings of our study, validating our methodology across multiple turbines.
- RE Figure 15: We acknowledge that the information presented is dense, which is intentional given the comprehensive nature of the analysis. However, we recognize the need for improved clarity in its interpretation. To address this:
  - We have added a paragraph explaining how to interpret the heat map, including the use of absolute values and the purpose of the colour scale.
  - We emphasize that the figure serves as a guide to identify sensors and wind speed regions for further analysis, rather than providing exact values.
  - We've included additional context relating the Cohen's d values.
- Captions for Figure 12, A1 and A2 improve to clarify and compensate for text arrangement of figures
- Captions for various figures have been improved
